# Supplementary material for: Nutrients cause grassland biomass to outpace herbivory
Source: PubMed Central journal article supplement (PMC7695826; doi:10.1038/s41467-020-19870-y), 2020-11-27
Supplement: 41467_2020_19870_MOESM1_ESM.pdf [file 41467_2020_19870_MOESM1_ESM.pdf]

**Supplementary Table 1.** Nutrient Network sites included in the current study. Data shown are location, duration of experimental treatment, whether domestic herbivores were present (all sites had wild herbivores), the herbivore index value, and the modeled potential grazer biomass value.

| Site number | Site code    | Continent | Country        | Latitude | Longitude | Exp. years | Domestic herbivores | Herbivore index (square root) | Modeled grazer biomass |
|-------------|--------------|-----------|----------------|----------|-----------|------------|---------------------|-------------------------------|------------------------|
| 1           | sereng.tz    | Africa    | Tanzania       | -2.255   | 34.513    | 4          | No                  | 5.39                          | 1.69                   |
| 2           | gilb.za      | Africa    | Zambia         | -29.284  | 30.292    | 3          | No                  | 2.24                          | 3.39                   |
| 3           | azi.cn       | Asia      | China          | 33.670   | 101.870   | 4          | Yes                 | 2.00                          | 1.73                   |
| 4           | kibber.in    | Asia      | India          | 32.320   | 78.010    | 6          | Yes                 | 4.69                          | 0.01                   |
| 5           | bogong.au    | Australia | Australia      | -36.874  | 147.254   | 10         | No                  | 2.24                          | 2.57                   |
| 6           | burrawan.au  | Australia | Australia      | -27.735  | 151.140   | 11         | Yes                 | 3.61                          | 1.69                   |
| 7           | kiny.au      | Australia | Australia      | -36.200  | 143.750   | 11         | No                  | 2.24                          | 1.51                   |
| 8           | mtca.au      | Australia | Australia      | -31.782  | 117.611   | 10         | Yes                 | 3.00                          | 1.09                   |
| 9           | ping.au      | Australia | Australia      | -32.496  | 116.973   | 5          | No                  | 4.00                          | 1.75                   |
| 10          | pinj.au      | Australia | Australia      | -27.531  | 152.923   | 5          | Yes                 | 2.45                          | 1.09                   |
| 11          | yarra.au     | Australia | Australia      | -33.610  | 150.730   | 5          | No                  | 2.45                          | 2.02                   |
| 12          | frue.ch      | Europe    | Switzerland    | 47.113   | 8.542     | 7          | No                  | 1.73                          | 2.00                   |
| 13          | valm.ch      | Europe    | Switzerland    | 46.631   | 10.372    | 10         | No                  | 3.16                          | 2.16                   |
| 14          | bayr.de      | Europe    | Germany        | 49.917   | 11.583    | 3          | No                  | NA                            | 1.24                   |
| 15          | pape.de      | Europe    | Germany        | 53.086   | 7.473     | 6          | No                  | 2.65                          | 0.34                   |
| 16          | kilp.fi      | Europe    | Finland        | 69.057   | 20.875    | 5          | No                  | 3.16                          | 0.33                   |
| 17          | saana.fi     | Europe    | Finland        | 69.037   | 20.843    | 4          | No                  | NA                            | 0.33                   |
| 18          | cereep.fr    | Europe    | France         | 48.280   | 2.660     | 6          | No                  | NA                            | 0.47                   |
| 19          | burren.ie    | Europe    | Ireland        | 53.072   | -8.993    | 3          | No                  | NA                            | 0.40                   |
| 20          | comp.pt      | Europe    | Portugal       | 38.829   | -8.791    | 7          | No                  | 1.00                          | 0.78                   |
| 21          | hero.uk      | Europe    | United Kingdom | 51.411   | -0.639    | 5          | No                  | 2.83                          | 0.34                   |
| 22          | lancaster.uk | Europe    | United Kingdom | 53.986   | -2.628    | 9          | Yes                 | 3.00                          | 0.41                   |
| 23          | rook.uk      | Europe    | United Kingdom | 51.406   | -0.644    | 5          | No                  | 2.83                          | 0.34                   |
| 24          | cowi.ca      | N America | Canada         | 48.809   | -123.630  | 11         | No                  | 1.73                          | 2.01                   |
| 25          | koffler.ca   | N America | Canada         | 44.024   | -79.536   | 8          | No                  | 2.83                          | 0.35                   |
| 26          | arch.us      | N America | United States  | 27.150   | -81.183   | 3          | No                  | 2.83                          | 1.22                   |
| 27          | barta.us     | N America | United States  | 42.245   | -99.652   | 4          | No                  | 3.00                          | 2.12                   |
| 28          | bldr.us      | N America | United States  | 39.972   | -105.234  | 8          | No                  | 1.41                          | 1.96                   |
| 29          | bnch.us      | N America | United States  | 44.277   | -121.968  | 11         | No                  | 2.83                          | 3.66                   |
| 30          | cbgb.us      | N America | United States  | 41.785   | -93.385   | 9          | No                  | 3.16                          | 1.84                   |
| 31          | cdcr.us      | N America | United States  | 45.425   | -93.212   | 11         | No                  | 2.83                          | 0.37                   |
| 32          | cdpt.us      | N America | United States  | 41.200   | -101.630  | 11         | No                  | 2.65                          | 3.09                   |
| 33          | elliott.us   | N America | United States  | 32.875   | -117.052  | 11         | No                  | 2.83                          | 0.58                   |

|    |            |           |               |         |          |    |     |      |      |
|----|------------|-----------|---------------|---------|----------|----|-----|------|------|
| 34 | glcr.us    | N America | United States | 41.339  | -96.140  | 2  | No  | 2.65 | 2.84 |
| 35 | hall.us    | N America | United States | 36.872  | -86.702  | 7  | No  | 2.24 | 0.39 |
| 36 | hart.us    | N America | United States | 42.724  | -119.498 | 5  | No  | 3.32 | 0.23 |
| 37 | hnvr.us    | N America | United States | 43.419  | -72.138  | 3  | No  | 2.83 | 0.41 |
| 38 | hopl.us    | N America | United States | 39.013  | -123.060 | 11 | No  | 2.45 | 1.64 |
| 39 | kbs.us     | N America | United States | 42.409  | -85.391  | 4  | No  | NA   | 1.08 |
| 40 | konz.us    | N America | United States | 39.071  | -96.583  | 11 | No  | 1.41 | 3.73 |
| 41 | look.us    | N America | United States | 44.205  | -122.128 | 7  | No  | 2.83 | 0.42 |
| 42 | mcla.us    | N America | United States | 38.864  | -122.406 | 11 | No  | 2.24 | 1.64 |
| 43 | sage.us    | N America | United States | 39.430  | -120.240 | 6  | No  | 3.00 | 1.89 |
| 44 | saline.us  | N America | United States | 39.050  | -99.100  | 8  | No  | 1.41 | 3.96 |
| 45 | sava.us    | N America | United States | 33.344  | -81.651  | 5  | No  | 2.24 | 0.43 |
| 46 | sgs.us     | N America | United States | 40.817  | -104.767 | 11 | No  | 3.74 | 1.92 |
| 47 | shps.us    | N America | United States | 44.243  | -112.198 | 9  | Yes | 2.65 | 1.23 |
| 48 | sier.us    | N America | United States | 39.236  | -121.284 | 11 | No  | 2.00 | 1.89 |
| 49 | smith.us   | N America | United States | 48.207  | -122.625 | 8  | No  | 2.65 | 2.01 |
| 50 | spin.us    | N America | United States | 38.136  | -84.501  | 11 | No  | 2.00 | 0.48 |
| 51 | trel.us    | N America | United States | 40.075  | -88.829  | 9  | No  | 2.24 | 0.63 |
| 52 | tyso.us    | N America | United States | 38.519  | -90.565  | 4  | No  | 2.00 | 0.80 |
| 53 | ufrec.us   | N America | United States | 27.433  | -81.917  | 2  | No  | NA   | 1.22 |
| 54 | unc.us     | N America | United States | 36.008  | -79.020  | 4  | No  | 2.00 | 0.55 |
| 55 | chilcas.ar | S America | Argentina     | -36.276 | -58.266  | 6  | No  | 0.00 | 0.74 |
| 56 | marc.ar    | S America | Argentina     | -37.715 | -57.425  | 7  | No  | 2.83 | 0.59 |
| 57 | potrok.ar  | S America | Argentina     | -51.916 | -70.407  | 3  | Yes | 2.83 | 2.17 |
| 58 | lagoas.br  | S America | Brazil        | -20.983 | -51.799  | 3  | No  | NA   | 1.38 |

**Supplementary Table 2.** Description of exceptions to the fence design; sites not included in this list have standard design.

| Site code    | Fence exception description                                                                                                                                                                                                                                                             | Herbivores excluded    |
|--------------|-----------------------------------------------------------------------------------------------------------------------------------------------------------------------------------------------------------------------------------------------------------------------------------------|------------------------|
| bayr.de      | 1.5 m high fences with 12.7 x 12.7 mm wire mesh and wooden posts. Entire site is fenced to exclude deer; other wild vertebrate herbivores are still present on site.                                                                                                                    | Wild herbivore         |
| cdpt.us      | 1.5 m of 10 cm mesh cattle panels, with hardware cloth up to 50 cm from ground level.                                                                                                                                                                                                   | Wild herbivores        |
| hall.us      | Similar to NutNet standard with two modifications: 3.6 cm hardware cloth and 1.5 m high fences.                                                                                                                                                                                         | Wild herbivores        |
| hart.us      | Similar to NutNet standard but instead of 4 wires strung above the hardware cloth, we covered the entire top half of the fence with hardware cloth.                                                                                                                                     | Wild herbivores        |
| lancaster.uk | Similar to NutNet standard but top strand at 1.2 m.                                                                                                                                                                                                                                     | Sheep, wild herbivores |
| sereng.tz    | Posts are made of large steel pipes buried to a depth of approximately 1 m and reinforced with concrete. Fences are approximately 1.3 m tall and made of thick wire gauge fence material that has been threaded through a piece of rebar that has been welded to the steel metal posts. | Wild herbivores        |
| shps.us      | Similar to NutNet standard but top strand at 1.2 m.                                                                                                                                                                                                                                     | Sheep, wild herbivores |
| spin.us      | Similar to NutNet standard with two modifications: 3.6 cm hardware cloth and 1.5 m high fences.                                                                                                                                                                                         | Wild herbivores        |
| valm.ch      | 2.7 m wooden poles (25 cm diameter) driven 70 cm into ground, 3 m apart, covered with 5 cm square mesh to 2 m high and with extra cabling and supports to prevent snow damage. Fences enclose 6 m x 7 m area.                                                                           | Wild herbivores        |

**Supplementary Table 3A.** Model testing the effects of nutrient addition and fencing and their interactions on aboveground community biomass in n=58 sites with two to four years of response. The main effect values represent model mean differences of the experimental treatment from the control after controlling for site and year as random effects. The nutrient by fence interaction (“Nut\*Fnc”) is compared to the sum of the effect of nutrients alone and fencing alone. Linear mixed-effects model was fit by maximum likelihood. Random effects in the model were ‘site’ (s.d.= 0.31) and ‘treatment year nested within site’ (s.d.=0.19). The intercept is the mean value of the unfenced and unfertilized control plots. Live biomass was log<sub>10</sub> transformed. Table shows parameter estimate, standard error, degrees of freedom, test statistic, and p-value for the 2-tailed test.

Model formula:  $\text{lm.lg} \sim \text{fert} * \text{exclosure} + (1 | \text{site/year\_trt})$

|                     | Estimate               | Std. Error             | DF   | t-value | p-value |
|---------------------|------------------------|------------------------|------|---------|---------|
| (Intercept)         | 2.39                   | 4.35 x10 <sup>-2</sup> | 60   | 54.86   | < 0.001 |
| Fertilization (Nut) | 0.14                   | 1.21 x10 <sup>-2</sup> | 2513 | 11.61   | < 0.001 |
| Fencing (Fnc)       | 4.18 x10 <sup>-2</sup> | 1.23 x10 <sup>-2</sup> | 2515 | 3.40    | < 0.001 |
| Nut x Fnc           | 2.26 x10 <sup>-2</sup> | 1.74 x10 <sup>-2</sup> | 2513 | 1.30    | 0.194   |

**Supplementary Table 3B.** Model testing the effects of nutrient addition and fencing and their interactions on aboveground community biomass in n=42 sites with five to seven years of response. The main effect values represent model mean differences of the experimental treatment from the control after controlling for site and year as random effects. The nutrient by fence interaction (“Nut\*Fnc”) is compared to the sum of the effect of nutrients alone and fencing alone. Linear mixed-effects model was fit by maximum likelihood. Random effects in the model were ‘site’ (s.d.= 0.33) and ‘treatment year nested within site’ (s.d.=0.25). The intercept is the mean value of the unfenced and unfertilized control plots. Live biomass was log<sub>10</sub> transformed. Table shows parameter estimate, standard error, degrees of freedom, test statistic, and p-value for the 2-tailed test.

Model formula:  $\text{lm.lg} \sim \text{fert} * \text{exclosure} + (1 | \text{site/year\_trt})$

|                     | Estimate | Std. Error | DF   | t-value | p-value |
|---------------------|----------|------------|------|---------|---------|
| (Intercept)         | 2.34     | 0.05       | 41.9 | 43.42   | < 0.001 |
| Fertilization (Nut) | 0.17     | 0.01       | 3074 | 14.14   | < 0.001 |
| Fencing (Fnc)       | 0.05     | 0.01       | 3074 | 4.58    | < 0.001 |
| Nut x Fnc           | -0.02    | 0.02       | 3073 | -1.00   | 0.320   |

**Supplementary Table 3C.** Model testing the effects of nutrient addition and fencing and their interactions on aboveground community biomass in n=24 sites with eight to ten years of response. The main effect values represent model mean differences of the experimental treatment from the control after controlling for site and year as random effects. The nutrient by fence interaction (“Nut\*Fnc”) is compared to the sum of the effect of nutrients alone and fencing alone. Linear mixed-effects model was fit by maximum likelihood. Random effects in the model were ‘site’ (s.d.= 0.24) and ‘treatment year nested within site’ (s.d.=0.27). The intercept is the mean value of the unfenced and unfertilized control plots. Live biomass was log<sub>10</sub> transformed. Table shows parameter estimate, standard error, degrees of freedom, test statistic, and p-value for the 2-tailed test.

Model formula:  $\text{lm.lg} \sim \text{fert} * \text{exclosure} + (1 | \text{site/year\_trt})$

|                     | Estimate | Std. Error | DF   | t-value | p-value |
|---------------------|----------|------------|------|---------|---------|
| (Intercept)         | 2.33     | 0.05       | 23.6 | 43.69   | < 0.001 |
| Fertilization (Nut) | 0.20     | 0.01       | 2750 | 16.82   | < 0.001 |
| Fencing (Fnc)       | 0.06     | 0.01       | 2751 | 4.87    | < 0.001 |
| Nut x Fnc           | -0.03    | 0.02       | 2750 | -1.99   | 0.047   |

**Supplementary Table 3D.** Model testing the effects of nutrient addition and fencing and their interactions on aboveground community biomass in n=8 sites with domestic grazing with two to four years of response. The main effect values represent model mean differences of the experimental treatment from the control after controlling for site and year as random effects. The nutrient by fence interaction (“Nut\*Fnc”) is compared to the sum of the effect of nutrients alone and fencing alone. Linear mixed-effects model was fit by maximum likelihood. Random effects in the model were ‘site’ (s.d.= 0.41) and ‘treatment year nested within site’ (s.d.=0.17). The intercept is the mean value of the unfenced and unfertilized control plots. Live biomass was log<sub>10</sub> transformed. Table shows parameter estimate, standard error, degrees of freedom, test statistic, and p-value for the 2-tailed test.

Model formula:  $\text{lm.lg} \sim \text{fert} * \text{exclosure} + (1 | \text{site/year\_trt})$

|                     | Estimate | Std. Error | DF    | t-value | p-value |
|---------------------|----------|------------|-------|---------|---------|
| (Intercept)         | 2.13     | 0.15       | 7.3   | 14.27   | < 0.001 |
| Fertilization (Nut) | 0.09     | 0.04       | 323.1 | 2.37    | 0.019   |
| Fencing (Fnc)       | 0.07     | 0.03       | 323.2 | 1.75    | 0.081   |
| Nut x Fnc           | 0.15     | 0.05       | 323.1 | 2.79    | 0.006   |

**Supplementary Table 4A.** Effects of site biotic factors – an empirical herbivore index, modeled grazer biomass, site-level plant species richness, and species turnover – on plant biomass in response to experimental fencing and fertilization treatments after two treatment years (to maximize spatial extent). Models included the subset of n=51 sites with values for all model covariates. Linear mixed-effects model was fit by maximum likelihood. Random effects in the model were ‘site’ (s.d.= 0.28) and ‘treatment year nested within site’ (s.d.=0.19). The intercept is the mean value of the unfenced and unfertilized control plots. Live biomass was  $\log_{10}$  transformed and the grazing intensity index was square root transformed. Table shows parameter estimate, standard error, degrees of freedom, test statistic, and p-value for the 2-tailed test. Model formula:  $\text{lm.lg} \sim (\text{fert} * \text{exclosure}) * (\text{site\_richness} + \text{meanJacc} + \text{grazer.biomass} + \text{herb.index.sq}) + (1 | \text{site/year\_trt})$

|                                | Estimate                | Std. Error             | DF    | t-value | p-value |
|--------------------------------|-------------------------|------------------------|-------|---------|---------|
| (Intercept)                    | 2.97                    | 0.20                   | 56.43 | 15.12   | < 0.001 |
| Fertilization (Nut)            | 0.11                    | 0.07                   | 2261  | 1.55    | 0.121   |
| Fencing (Fnc)                  | -0.02                   | 0.07                   | 2263  | -0.30   | 0.763   |
| Site richness (Rich)           | -3.01 x10 <sup>-3</sup> | 1.53 x10 <sup>-3</sup> | 55.7  | -1.97   | 0.053   |
| Species turnover (Jacc)        | 0.14                    | 0.07                   | 2295  | 1.98    | 0.048   |
| Modeled grazer biomass (MGraz) | 7.41 x10 <sup>-3</sup>  | 0.04                   | 55.43 | 0.17    | 0.864   |
| Herbivore index (Intens)       | -0.18                   | 0.05                   | 54.17 | -3.56   | 0.001   |
| Nut x Fnc                      | -0.06                   | 0.10                   | 2261  | -0.63   | 0.528   |
| Nut x Rich                     | 5.64 x10 <sup>-4</sup>  | 4.85 x10 <sup>-4</sup> | 2261  | 1.16    | 0.245   |
| Nut x Jacc                     | 0.09                    | 0.09                   | 2263  | 1.06    | 0.291   |
| Nut x MGraz                    | 0.02                    | 0.01                   | 2262  | 1.67    | 0.096   |
| Nut x Intens                   | -0.03                   | 0.02                   | 2261  | -1.91   | 0.057   |
| Fnc x Rich                     | 1.20 x10 <sup>-4</sup>  | 4.94 x10 <sup>-4</sup> | 2262  | 0.24    | 0.808   |
| Fnc x Jacc                     | -0.07                   | 0.09                   | 2264  | -0.78   | 0.436   |
| Fnc x MGraz                    | 4.38 x10 <sup>-3</sup>  | 0.01                   | 2262  | 0.33    | 0.745   |
| Fnc x Intens                   | 0.03                    | 0.02                   | 2262  | 1.87    | 0.062   |
| Nut x Fnc x Rich               | 2.45 x10 <sup>-4</sup>  | 6.97 x10 <sup>-4</sup> | 2261  | 0.35    | 0.725   |
| Nut x Fnc x Jacc               | -0.09                   | 0.13                   | 2264  | -0.71   | 0.476   |
| Nut x Fnc x MGraz              | -0.03                   | 0.02                   | 2262  | -1.33   | 0.184   |
| Nut x Fnc x Intens             | 0.06                    | 0.02                   | 2261  | 2.52    | 0.012   |

**Supplementary Table 4B.** Effects of climate (mean annual precipitation, mean annual temperature, mean precipitation in the warmest quarter), an empirical herbivore index, and modeled grazer biomass on biomass in response to experimental fencing and fertilization treatments after two treatment years (to maximize spatial extent). Models included covariates available for the subset of n=51 sites with values for all model covariates. Linear mixed-effects model was fit by maximum likelihood. Random effects in the model were ‘site’ (s.d.= 0.25) and ‘treatment year nested within site’ (s.d.=0.19). The intercept is the mean value of the unfenced and unfertilized control plots. Live biomass was  $\log_{10}$  transformed. Table shows parameter estimate, standard error, degrees of freedom, test statistic, and p-value for the 2-tailed test. Model formula:  $\text{lm.lg} \sim (\text{fert} * \text{exclosure}) * (\text{map} + \text{mat} + \text{map\_warm\_q} + \text{site\_richness} + \text{grazer.biomass} + \text{herb.index.sq}) + (1 | \text{site/year\_trt})$

|                                  | Estimate                | Std. Error             | DF    | t-value | p-value |
|----------------------------------|-------------------------|------------------------|-------|---------|---------|
| (Intercept)                      | 2.56                    | 0.25                   | 55.82 | 10.42   | < 0.001 |
| Fertilization (Nut)              | 0.08                    | 0.09                   | 2264  | 0.89    | 0.374   |
| Fencing (Fnc)                    | 0.03                    | 0.09                   | 2264  | 0.30    | 0.765   |
| Mean annual precipitation (MAP)  | 1.41 x10 <sup>-4</sup>  | 1.22 x10 <sup>-4</sup> | 55.47 | 1.16    | 0.252   |
| Mean annual temperature (MAT)    | 5.68 x10 <sup>-3</sup>  | 7.04 x10 <sup>-3</sup> | 55.62 | 0.81    | 0.423   |
| MAP warmest quarter (MAPWQ)      | 6.58 x10 <sup>-4</sup>  | 3.36 x10 <sup>-4</sup> | 55.65 | 1.96    | 0.055   |
| Site richness (Rich)             | -1.90 x10 <sup>-3</sup> | 1.42 x10 <sup>-3</sup> | 55.49 | -1.33   | 0.188   |
| Modeled grazer biomass (MGraz)   | -3.23 x10 <sup>-3</sup> | 0.04                   | 55.68 | -0.08   | 0.935   |
| Grazing intensity index (Intens) | -0.15                   | 0.05                   | 55.05 | -2.99   | 0.004   |
| Nut x Fnc                        | 0.07                    | 0.12                   | 2263  | 0.54    | 0.591   |
| Nut x MAP                        | 1.63 x10 <sup>-5</sup>  | 4.12 x10 <sup>-5</sup> | 2264  | 0.40    | 0.692   |
| Nut x MAT                        | 4.42 x10 <sup>-3</sup>  | 2.37 x10 <sup>-3</sup> | 2264  | 1.87    | 0.062   |

|                    |                         |                        |      |       |       |
|--------------------|-------------------------|------------------------|------|-------|-------|
| Nut x MAPWQ        | -5.56 x10 <sup>-5</sup> | 1.12 x10 <sup>-4</sup> | 2263 | -0.50 | 0.620 |
| Nut x Rich         | 7.04 x10 <sup>-4</sup>  | 4.70 x10 <sup>-4</sup> | 2263 | 1.50  | 0.134 |
| Nut x MGraz        | 0.02                    | 0.01                   | 2264 | 1.76  | 0.078 |
| Nut x Intens       | -0.02                   | 0.02                   | 2263 | -1.49 | 0.137 |
| Fnc x MAP          | -1.22 x10 <sup>-5</sup> | 4.16 x10 <sup>-5</sup> | 2264 | -0.29 | 0.769 |
| Fnc x MAT          | -3.50 x10 <sup>-3</sup> | 2.38 x10 <sup>-3</sup> | 2265 | -1.48 | 0.140 |
| Fnc x MAPWQ        | -2.50 x10 <sup>-5</sup> | 1.13 x10 <sup>-4</sup> | 2266 | -0.22 | 0.826 |
| Fnc x Rich         | -1.44 x10 <sup>-4</sup> | 4.75 x10 <sup>-4</sup> | 2264 | -0.30 | 0.761 |
| Fnc x MGraz        | 9.69 x10 <sup>-3</sup>  | 0.01                   | 2264 | 0.73  | 0.464 |
| Fnc x Intens       | 0.03                    | 0.02                   | 2264 | 1.49  | 0.137 |
| Nut x Fnc x MAP    | -1.44 x10 <sup>-4</sup> | 5.86 x10 <sup>-5</sup> | 2264 | -2.45 | 0.014 |
| Nut x Fnc x MAT    | -9.56 x10 <sup>-4</sup> | 3.37 x10 <sup>-3</sup> | 2265 | -0.28 | 0.777 |
| Nut x Fnc x MAPWQ  | 1.34 x10 <sup>-4</sup>  | 1.60 x10 <sup>-4</sup> | 2263 | 0.84  | 0.403 |
| Nut x Fnc x Rich   | -1.02 x10 <sup>-4</sup> | 6.71 x10 <sup>-4</sup> | 2264 | -0.15 | 0.880 |
| Nut x Fnc x MGraz  | -0.03                   | 0.02                   | 2264 | -1.48 | 0.139 |
| Nut x Fnc x Intens | 0.04                    | 0.02                   | 2263 | 1.72  | 0.086 |

**Supplementary Table 4C.** Effects of plot-scale soil chemistry, site-scale nitrogen deposition rate, an empirical herbivore index, and modeled grazer biomass on biomass in response to experimental fencing and fertilization treatments after two treatment years (to maximize spatial extent). Models included covariates available for a subset of n=36 sites. Linear mixed-effects model was fit by maximum likelihood. Random effects in the model were 'site' (s.d.= 0.20) and 'treatment year nested within site' (s.d.=0.20). The intercept is the mean value of the unfenced and unfertilized control plots. Live biomass was log<sub>10</sub> transformed. Table shows parameter estimate, standard error, degrees of freedom, test statistic, and p-value for the 2-tailed test. Model formula:  $\text{lm.lg} \sim (\text{fert} * \text{exclosure}) * (\text{ndep} + \text{ppm}_n + \text{ppm}_p + \text{ph} + \text{herb.index.sq} + \text{grazer.biomass} + \text{site\_richness}) + (1 | \text{site/year\_trt})$

|                                  | Estimate                | Std. Error             | DF    | t-value | p-value |
|----------------------------------|-------------------------|------------------------|-------|---------|---------|
| (Intercept)                      | 2.70                    | 0.24                   | 80.7  | 11.01   | < 0.001 |
| Fertilization (Nut)              | 0.06                    | 0.17                   | 1505  | 0.37    | 0.714   |
| Fencing (Fnc)                    | -0.22                   | 0.17                   | 1507  | -1.36   | 0.176   |
| N deposition (Ndep)              | 0.02                    | 6.13 x10 <sup>-3</sup> | 43.35 | 3.74    | 0.001   |
| Nitrogen (N)                     | 4.73 x10 <sup>-6</sup>  | 6.13 x10 <sup>-6</sup> | 1004  | 0.77    | 0.441   |
| Phosphorus (P)                   | 3.82 x10 <sup>-4</sup>  | 5.23 x10 <sup>-4</sup> | 957.9 | 0.73    | 0.466   |
| pH (pH)                          | -0.04                   | 0.02                   | 1315  | -1.63   | 0.103   |
| Grazing intensity index (Intens) | -0.11                   | 0.05                   | 39.09 | -2.09   | 0.043   |
| Modeled grazer biomass (MGraz)   | 0.07                    | 0.04                   | 39.97 | 1.47    | 0.149   |
| Site richness (Rich)             | -2.09 x10 <sup>-3</sup> | 1.52 x10 <sup>-3</sup> | 39.13 | -1.37   | 0.178   |
| Nut x Fnc                        | 0.02                    | 0.23                   | 1508  | 0.09    | 0.930   |
| Nut x Ndep                       | 1.70 x10 <sup>-3</sup>  | 2.86 x10 <sup>-3</sup> | 1512  | 0.59    | 0.552   |
| Nut x N                          | -2.13 x10 <sup>-6</sup> | 5.94 x10 <sup>-6</sup> | 1514  | -0.36   | 0.720   |
| Nut x P                          | -1.73 x10 <sup>-4</sup> | 4.30 x10 <sup>-4</sup> | 1507  | -0.40   | 0.688   |
| Nut x pH                         | 0.03                    | 0.02                   | 1506  | 1.31    | 0.190   |
| Nut x Intens                     | -0.06                   | 0.02                   | 1504  | -2.72   | 0.007   |
| Nut x MGraz                      | 0.03                    | 0.02                   | 1506  | 1.55    | 0.122   |
| Nut x Rich                       | 5.70 x10 <sup>-4</sup>  | 6.23 x10 <sup>-4</sup> | 1504  | 0.91    | 0.361   |
| Fnc x Ndep                       | -2.37 x10 <sup>-3</sup> | 2.98 x10 <sup>-3</sup> | 1511  | -0.80   | 0.426   |
| Fnc x N                          | 1.64 x10 <sup>-5</sup>  | 5.93 x10 <sup>-6</sup> | 1507  | 2.77    | 0.006   |
| Fnc x P                          | 2.25 x10 <sup>-5</sup>  | 4.32 x10 <sup>-4</sup> | 1505  | 0.05    | 0.958   |
| Fnc x pH                         | 7.19 x10 <sup>-3</sup>  | 0.02                   | 1508  | 0.31    | 0.756   |
| Fnc x Intens                     | 0.04                    | 0.02                   | 1507  | 1.60    | 0.111   |
| Fnc x MGraz                      | 0.03                    | 0.02                   | 1511  | 1.44    | 0.149   |
| Fnc x Rich                       | 7.41 x10 <sup>-4</sup>  | 6.35 x10 <sup>-4</sup> | 1506  | 1.17    | 0.243   |
| Nut x Fnc x Ndep                 | -1.76 x10 <sup>-3</sup> | 4.11 x10 <sup>-3</sup> | 1507  | -0.43   | 0.669   |
| Nut x Fnc x N                    | -1.50 x10 <sup>-5</sup> | 8.58 x10 <sup>-6</sup> | 1509  | -1.75   | 0.080   |
| Nut x Fnc x P                    | -2.00 x10 <sup>-4</sup> | 6.15 x10 <sup>-4</sup> | 1504  | -0.33   | 0.745   |
| Nut x Fnc x pH                   | -0.01                   | 0.03                   | 1509  | -0.34   | 0.733   |
| Nut x Fnc x Intens               | 0.07                    | 0.03                   | 1505  | 2.12    | 0.034   |
| Nut x Fnc x MGraz                | -0.03                   | 0.03                   | 1509  | -1.04   | 0.301   |
| Nut x Fnc x Rich                 | -1.93 x10 <sup>-4</sup> | 8.89 x10 <sup>-4</sup> | 1505  | -0.22   | 0.828   |

**Supplementary Figure 1.** Among-year dynamics show interannual variability in mean grassland biomass in control plots and in response to fertilization and fencing treatments. Error bars show 1 standard error.

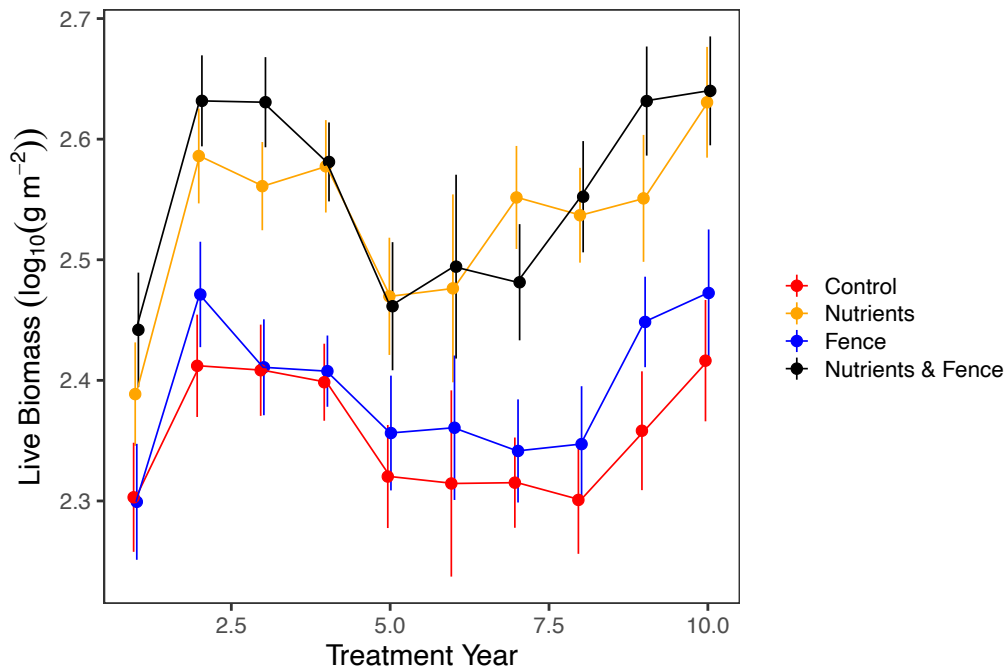

**Supplementary Figure 2.** Site-level effects of herbivore removal on grassland biomass with and without elevated nutrient supply. Numbers identify sites (SupplementaryTable 1), and the 1:1 relationship is shown as a solid black line. These results are broadly consistent regardless of the number of experimental years, so we show results across the greatest spatial extent (n=58 sites), representing 2-3 years of treatment responses.

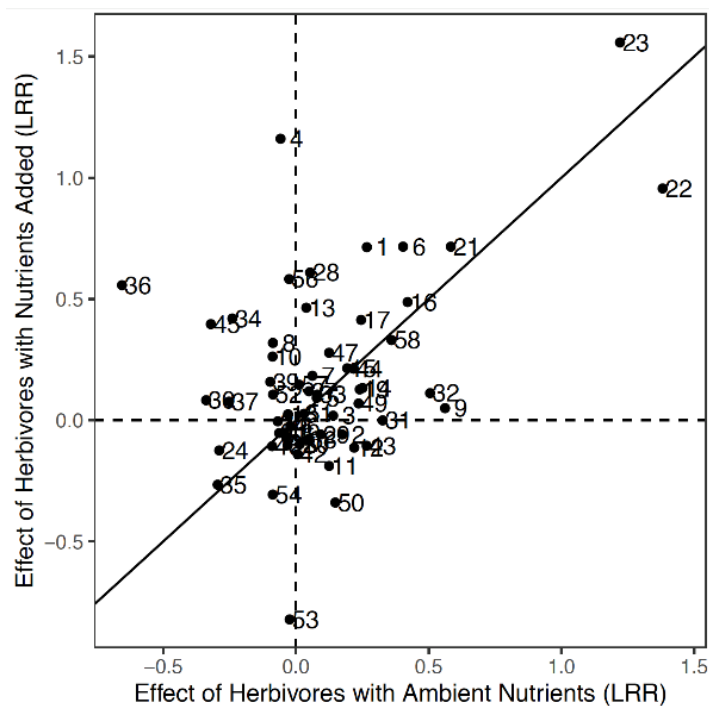

**Supplementary Figure 3.** Treatment effects on aboveground grassland biomass after two to four years of response at the n=8 sites with both domestic livestock and wild herbivores (full model shown in Supplementary Table 3D). Error bars represent 95% confidence intervals. Main effect values represent model mean differences of the experimental treatment from the control after controlling for site and year as random effects. The nutrient by fence interaction (“Nut\*Fnc”) is compared to the sum of the effect of nutrients alone and fencing alone, thus the substantial “Nut\*Fnc” term indicates that herbivores consume more biomass under fertilized than ambient conditions.

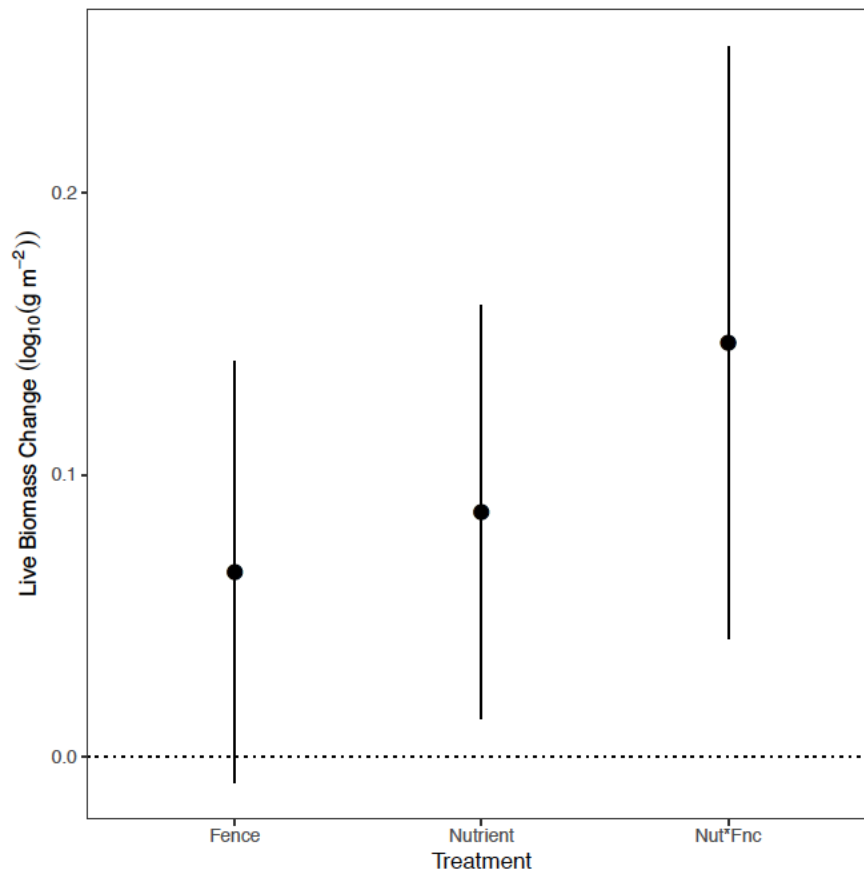



**Supplementary Table 5.** Author contributions and site-level acknowledgments. Site names match those in Supplementary Table 1.

| Name                      | Site(s) used in analysis                             | Developed and framed research question(s) | Analyzed data | Contributed to data analyses | Wrote the paper | Contributed to paper writing | Site coordinator | Nutrient Network coordinator |
|---------------------------|------------------------------------------------------|-------------------------------------------|---------------|------------------------------|-----------------|------------------------------|------------------|------------------------------|
| Borer, Elizabeth          | bnch.us, cdcr.us, hopl.us, look.us, mcla.us, sier.us | x                                         | x             |                              | x               |                              | x                | x                            |
| Harpole, W. Stanley       | cbgb.us, sier.us                                     |                                           |               | x                            |                 | x                            | x                |                              |
| Adler, Peter B.           | shps.us                                              |                                           |               |                              |                 | x                            | x                |                              |
| Bugalho, Miguel           | comp.pt                                              |                                           |               |                              |                 | x                            | x                |                              |
| Cadotte, Marc W.          | koffler.ca                                           |                                           |               |                              |                 | x                            | x                |                              |
| Caldeira, Maria Conceição | comp.pt                                              |                                           |               |                              |                 | x                            | x                |                              |
| Campana, Sofia            | chilcas.ar                                           |                                           |               |                              |                 | x                            |                  |                              |
| Arnillas, Carlos Alberto  | koffler.ca                                           |                                           |               |                              |                 | x                            | x                |                              |
| Dickman, Chris R.         |                                                      |                                           |               |                              |                 | x                            | x                |                              |
| Dickson, Timothy L.       | glcr.us                                              |                                           |               |                              |                 | x                            | x                |                              |
| Donohue, Ian              | burren.ie                                            |                                           |               |                              |                 | x                            | x                |                              |
| Eskelinen, Anu            | kilp.fi, saana.fi                                    |                                           |               |                              |                 | x                            | x                |                              |
| Firn, Jennifer            | burrawan.au                                          |                                           |               |                              |                 | x                            | x                |                              |
| Graff, Pamela             | chilcas.ar                                           |                                           |               |                              |                 | x                            |                  |                              |
| Gruner, Daniel            | sage.us                                              |                                           |               |                              |                 | x                            | x                |                              |
| Heckman, Robert W.        | unc.us                                               |                                           |               |                              |                 | x                            | x                |                              |
| Koltz, Amanda             | tyso.us                                              |                                           |               |                              |                 | x                            |                  |                              |
| Komatsu, Kimberly         | konz.us, saline.us                                   |                                           |               |                              |                 | x                            | x                |                              |
| Lannes, Luciola           | lagoas.br                                            |                                           |               |                              |                 | x                            | x                |                              |
| MacDougall, Andrew S.     | cowi.ca                                              |                                           |               |                              |                 | x                            | x                |                              |
| Martina, Jason P.         |                                                      |                                           |               |                              |                 | x                            | x                |                              |
| Moore, Joslin L.          | bogong.au                                            |                                           |               |                              |                 | x                            | x                |                              |
| Mortensen, Brent          | cbgb.us                                              |                                           |               |                              |                 | x                            | x                |                              |
| Ochoa-Hueso, Raúl         | yarra.au                                             |                                           |               |                              |                 | x                            |                  |                              |
| Olde Venterink, Harry     | lagoas.br                                            |                                           |               |                              |                 | x                            | x                |                              |
| Power, Sally              | yarra.au                                             |                                           |               |                              |                 | x                            | x                |                              |
| Price, Jodi               | ping.au                                              |                                           |               |                              |                 | x                            | x                |                              |
| Risch, Anita C.           | valm.ch                                              |                                           |               |                              |                 | x                            | x                |                              |
| Sankaran, Mahesh          | kibber.in                                            |                                           |               |                              |                 | x                            | x                |                              |
| Schütz, Martin            | valm.ch                                              |                                           |               |                              |                 | x                            | x                |                              |
| Sitters, Judith           |                                                      |                                           |               |                              |                 | x                            |                  |                              |
| Stevens, Carly            | lancs.uk                                             |                                           |               |                              |                 | x                            | x                |                              |
| Virtanen, Risto           | kilp.fi, saana.fi                                    |                                           |               |                              |                 | x                            | x                |                              |
| Wilfahrt, Peter A.        | bayr.de                                              |                                           |               |                              |                 | x                            | x                |                              |
| Seabloom, Eric            | bnch.us, cdcr.us, hopl.us, look.us, mcla.us, sier.us | x                                         | x             |                              |                 | x                            | x                | x                            |

**Supplementary Table 6.** Principal investigators of sites contributing data but who are not authors, listed by site; site names match those in Supplementary Table 1. Their effort in providing samples was critical to this work.

| <b>Site PI</b>                              | <b>Site code</b> |
|---------------------------------------------|------------------|
| Elizabeth Boughton                          | arch.us          |
| Guozhen Du                                  | azi.cn           |
| David Wedin                                 | barta.us         |
| Anke Jentsch, Marie Spohn                   | bayr.de          |
| Kendi Davies, Brett Melbourne               | bldr.us          |
| Johannes Knops                              | cdpt.us          |
| Amandine Hansart, Beatriz Decenci re        | cereep.fr        |
| Laura Yahdjian, Enrique Chaneton            | chilcas.ar       |
| Elsa Cleland                                | elliott.us       |
| Sabine G sewell                             | frue.ch          |
| Peter Wragg                                 | gilb.za          |
| Rebecca McCulley                            | hall.us,         |
| Nicole DeCrappeo , David Pyke               | hart.us          |
| Michael Crawley                             | hero.uk,         |
| Elizabeth Wolkovich, Kathryn Cottingham     | hnvr.us          |
| Lars Brudvig                                | kbs.us           |
| John Morgan                                 | kiny.au          |
| Pedro Daleo, Juan Alberti                   | marc.ar          |
| Suzanne Prober                              | mtca.au          |
| Helmut Hillebrand                           | pape.de          |
| John Dwyer                                  | pinj.au          |
| Pablo Peri, Hector Bahamonde                | potrok.ar        |
| Ellen Damschen, John Orrock                 | sava.us          |
| T. Michael Anderson                         | sereng.tz        |
| Cynthia Brown, Julia Klein, Dana Blumenthal | sgs.us           |
| Janneke Hille Ris Lambers, Jonathan Bakker  | smith.us         |
| Andrew Leakey                               | trel.us          |
| Maria Silveira                              | ufrec.us         |
